# Supplementary material
Source: MDPI journal article supplement (https://www.mdpi.com/2227-9040/12/5/80)
Supplement: s1 [file s1]

# A Naked-Eye Colorimetric Ratio Method for the Selective and Sensitive Detection of L-Cys Based on a Silver Nanoflakes–Chromium (III) Ion System

Xi Zhang <sup>1</sup>, Yunyi Zhang <sup>1</sup>, Yuwei Gu <sup>1</sup>, Junyu Zhou <sup>2</sup>, Ming Li <sup>1,3,4,\*</sup> and Jian Qi <sup>5,\*</sup>

<sup>1</sup> College of Science, Hebei Agricultural University, Baoding 071001, China; zx470@outlook.com (X.Z.); lxzhyy@hebau.edu.cn (Y.Z.); 15630980688@163.com (Y.G.)

<sup>2</sup> Hunan Soil and Fertilizer Institute, Hunan Academy of Agricultural Sciences, Changsha 410125, China; zhoujunyu@hunaas.cn

<sup>3</sup> Shandong Key Laboratory of Storage and Transportation Technology of Agricultural Products, Jinan 250103, China

<sup>4</sup> National Engineering Research Center for Agricultural Products Logistics, Jinan 250103, China

<sup>5</sup> State Key Laboratory of Biochemical Engineering, Institute of Process Engineering, Chinese Academy of Sciences, Beijing 100190, China

\* Correspondence: Correspondence: lxlm1@hebau.edu.cn (M.L.); jq@ipe.ac.cn (J.Q.)

## 1. Supplementary Figure

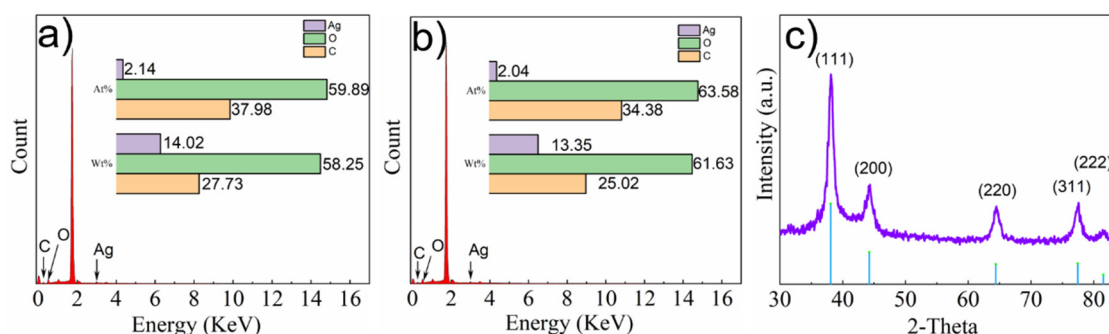

**Figure S1.** The picture describes the EDS results for (a) silver nanoflakes and (b) silver nanoflakes with the addition of Cr<sup>3+</sup>; the inset is the corresponding weight fraction and atomic fraction. (c) The results of the XRD analysis are compared with the standard chart for silver.

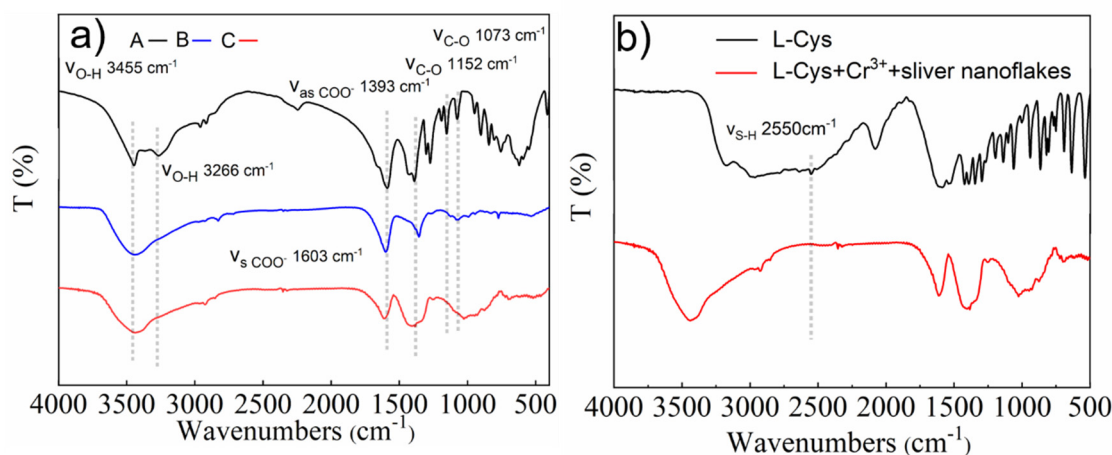

**Figure S2.** (a) FTIR spectra of (A) trisodium citrate, (B) silver nanoflakes, (C) silver nanoflakes with Cr<sup>3+</sup> (b) FTIR spectra of L-Cys, and silver nanoflakes with Cr<sup>3+</sup> and L-Cys.

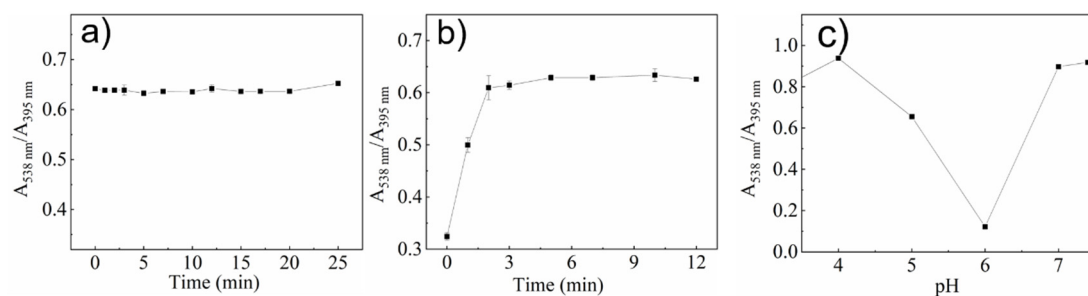

**Figure S3.** The picture describes (a) the reaction time of L-Cys with  $\text{Cr}^{3+}$  and (b) the reaction time with silver nanoflakes after their interaction. (c) The ratio of absorbance for different pHs (pH = 4, 5, 6, 7, 7.4).

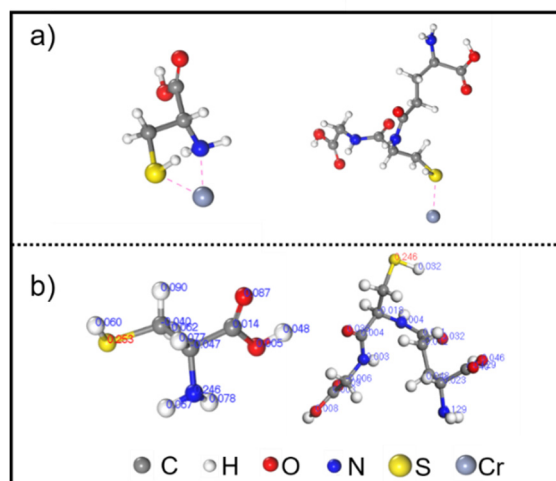

**Figure S4.** (a) Construction of binding energy models of L-Cys and SH with  $\text{Cr}^{3+}$ , respectively. (b) Calculation model and Fukui function data.

## 2. Supplementary Table

**Table S1.** Determination of L-Cys in beer using the proposed method (n = 3).

| Existence (nM) | Spiked (nM) | Found (nM) | Recovery (%) | RSD (%) |
|----------------|-------------|------------|--------------|---------|
| 221.13         | 100         | 301.23     | 93.80        | 1.19    |
| 221.13         | 200         | 398.13     | 94.50        | 1.47    |
| 221.13         | 300         | 511.98     | 98.20        | 1.93    |
| 221.13         | 400         | 621.34     | 100.03       | 2.24    |
| 221.13         | 500         | 750.22     | 104.03       | 2.40    |

**Table S2.** Determination of L-Cys in urine using the proposed method (n = 3).

| Existence ( $\mu\text{M}$ ) | Spiked ( $\mu\text{M}$ ) | Found ( $\mu\text{M}$ ) | Recovery (%) | RSD (%) |
|-----------------------------|--------------------------|-------------------------|--------------|---------|
| 0.20                        | 0.25                     | 0.42                    | 93.33        | 1.80    |
| 0.20                        | 0.50                     | 0.75                    | 107.14       | 6.78    |
| 0.20                        | 0.75                     | 0.93                    | 97.89        | 3.66    |

**Table S3.** Parameters characterizing molecular activity.

|       | LUMO      | HOMO      | (Ha)     | ELUMO-HOMO (eV) |
|-------|-----------|-----------|----------|-----------------|
| L-Cys | -0.060624 | -0.206836 | 0.146212 | 3.9             |
| GSH   | -0.069953 | -0.218457 | 0.148504 | 4.1             |
